# Supplementary material for: Exploring tumor endothelial cells heterogeneity in hepatocellular carcinoma: insights from single-cell sequencing and pseudotime analysis
Source: PeerJ. 2024 Oct 28;12:e18362. doi: 10.7717/peerj.18362 (PMC11526786; doi:10.7717/peerj.18362)
Supplement: Supplemental Information 2 [file peerj-12-18362-s002.xls]

## Sheet: Sheet1
ITEM TO CHECK	IMPORTANCE	CHECKLIST
EXPERIMENTAL DESIGN
Definition of experimental and control groups	E	Page7 line146-148
Number within each group	E	Page7 line146-148
Assay carried out by core lab or investigator's lab?	D	NA
Acknowledgement of authors' contributions	D	NA
SAMPLE
Description	E	Page7 line146-148
Volume/mass of sample processed	D	Page7 line146-148
Microdissection or macrodissection	E	Page7 line146-159
Processing procedure	E	Page7 line146-159
If frozen - how and how quickly?	E	Page7 line146-159
If fixed - with what, how quickly?	E	Page7 line146-159
Sample storage conditions and duration (especially for FFPE samples)	E	Page7 line146-159
NUCLEIC ACID EXTRACTION
Procedure and/or instrumentation	E	Page7 line146-159
Name of kit and details of any modifications	E	Page7 line146-159
Source of additional reagents used	D	Page7 line146-159
Details of DNase or RNAse treatment	E	NA
Contamination assessment (DNA or RNA)	E	Page7 line146-159
Nucleic acid quantification	E	Page7 line146-159
Instrument and method	E	NA
Purity (A260/A280)	D	NA
Yield	D	Page7 line146-159
RNA integrity method/instrument	E	Page7 line146-159
RIN/RQI or Cq of 3' and 5' transcripts	E	Page7 line146-159
Electrophoresis traces	D	NA
Inhibition testing (Cq dilutions, spike or other)	E	Page7 line146-159
REVERSE TRANSCRIPTION
Complete reaction conditions	E	Page7 line146-159
Amount of RNA and reaction volume	E	Page7 line146-159
Priming oligonucleotide (if using GSP) and concentration	E	Page7 line146-159
Reverse transcriptase and concentration	E	Page7 line146-159
Temperature and time	E	Page7 line146-159
Manufacturer of reagents and catalogue numbers	D	NA
Cqs with and without RT	D*	NA
Storage conditions of cDNA	D	NA
qPCR TARGET INFORMATION
If multiplex, efficiency and LOD of each assay.	E	Page7 line146-159
Sequence accession number	E	Page7 line146-159
Location of amplicon	D	NA
Amplicon length	E	Page7 line146-159
In silico specificity screen (BLAST, etc)	E	Page7 line146-159
Pseudogenes, retropseudogenes or other homologs?	D	NA
Sequence alignment	D	NA
Secondary structure analysis of amplicon	D	NA
Location of each primer by exon or intron (if applicable)	E	Page7 line146-159
What splice variants are targeted?	E	Page7 line146-159
qPCR OLIGONUCLEOTIDES
Primer sequences	E	Page7 line146-159
RTPrimerDB Identification Number	D	NA
Probe sequences	D**	NA
Location and identity of any modifications	E	Page7 line146-159
Manufacturer of oligonucleotides	D	NA
Purification method	D	NA
qPCR PROTOCOL
Complete reaction conditions	E	Page7 line146-159
Reaction volume and amount of cDNA/DNA	E	Page7 line146-159
Primer, (probe), Mg++ and dNTP concentrations	E	Page7 line146-159
Polymerase identity and concentration	E	Page7 line146-159
Buffer/kit identity and manufacturer	E	Page7 line146-159
Exact chemical constitution of the buffer	D	NA
Additives (SYBR Green I, DMSO, etc.)	E	Page7 line146-159
Manufacturer of plates/tubes and catalog number	D	NA
Complete thermocycling parameters	E	Page7 line146-159
Reaction setup (manual/robotic)	D	NA
Manufacturer of qPCR instrument	E	Page7 line146-159
qPCR VALIDATION
Evidence of optimisation (from gradients)	D	NA
Specificity (gel, sequence, melt, or digest)	E	Page7 line146-159
For SYBR Green I, Cq of the NTC	E	Page7 line146-159
Standard curves with slope and y-intercept	E	Page7 line146-159
PCR efficiency calculated from slope	E	Page7 line146-159
Confidence interval for PCR efficiency or standard error	D	NA
r2 of standard curve	E	Page7 line146-159
Linear dynamic range	E	Page7 line146-159
Cq variation at lower limit	E	Page7 line146-159
Confidence intervals throughout range	D	NA
Evidence for limit of detection	E	Page7 line146-159
If multiplex, efficiency and LOD of each assay.	E	Page7 line146-159
DATA ANALYSIS
qPCR analysis program (source, version)	E	Page7 line146-159
Cq method determination	E	Page7 line146-159
Outlier identification and disposition	E	Page7 line146-159
Results of NTCs	E	Page7 line146-159
Justification of number and choice of reference genes	E	Page7 line146-159
Description of normalisation method	E	Page7 line146-159
Number and concordance of biological replicates	D	NA
Number and stage (RT or qPCR) of technical replicates	E	Page7 line146-159
Repeatability (intra-assay variation)	E	Page7 line146-159
Reproducibility (inter-assay variation, %CV)	D	NA
Power analysis	D	NA
Statistical methods for result significance	E	Page7 line146-159
Software (source, version)	E	Page7 line146-159
Cq or raw data submission using RDML	D	NA
Table 1. MIQE checklist for authors, reviewers and editors. All essential information (E) must be submitted with the manuscript. Desirable
information (D) should be submitted if available. If using primers obtained from RTPrimerDB, information on qPCR target, oligonucleotides,
protocols and validation is available from that source.
*: Assessing the absence of DNA using a no RT assay is essential when first extracting RNA. Once the sample has been validated as
RDNA-free, inclusion of a no-RT control is desirable, but no longer essential.
**: Disclosure of the probe sequence is highly desirable and strongly encouraged. However, since not all commercial pre-designed assay
vendors provide this information, it cannot be an essential requirement. Use of such assays is advised against.
